# Supplementary material for: Theoretical analysis of charge-transfer electronic spectra of methylated benzenes—TCNE complexes including solvent effects: approaching experiment
Source: Springer Nature journal article supplement (doi:10.1007/s00214-012-1268-x), 2012-09-01
Supplement: MOESM1 [file 214_2012_1268_MOESM1_ESM.doc]

| Complex | Minimum I | Minimum II |
| --- | --- | --- |
| Benzene-TCNE |  |  |
| Toluene-TCNE |  |  |
| p-Xylene-TCNE |  |  |
| Mesitylene-TCNE |  |  |
| Durene-TCNE |  |  |
| Pentamethylbenzene-TCNE |  |  |
| Hexamethylbenzene – TCNE |  |  |

Electronic supplementary material 1

Scheme of structures of studied NMB-TCNE complexes

Electronic supplementary material 2

Static and optical dielectric constants for the solvent used in calculations.

| Solvent | εr | n2 |
| --- | --- | --- |
| Argon | 1.43 | 1.4300 |
| Krypton | 1.519 | 1.5190 |
| Xenon | 1.706 | 1.7060 |
| n-pentane | 1.8371 | 1.8428 |
| n-hexane | 1.8819 | 1.8904 |
| 2-methylpentane | 1.89 | 1.8810 |
| cyclohexane | 2.0165 | 2.0352 |
| hexafluorobenzene | 2.029 | 1.8981 |
| tetrachloromethane | 2.228 | 2.1319 |
| carbon disulfide | 2.6105 | 2.6631 |
| diisopropylether | 3.38 | 1.8712 |
| diethylamine | 3.5766 | 1.9221 |
| chloroform | 4.7113 | 2.0906 |
| methylacetate | 6.8615 | 1.8534 |
| 1-nonanol | 8.5991 | 2.0543 |
| dichloromethane | 8.93 | 2.0283 |
| 1-pentanol | 15.13 | 1.9884 |
| cyclohexanone | 15.619 | 2.1045 |
| 1-butanol | 17.332 | 1.9580 |
| acetone | 20.493 | 1.8463 |
| ethanol | 24.852 | 1.8526 |
| benzonitrile | 25.592 | 2.3375 |
| methanol | 32.613 | 1.7657 |
| acetonitrile | 35.688 | 1.8069 |
| nitromethane | 36.562 | 1.9091 |
| dimethylsulfoxide | 46.826 | 2.0079 |
| formamide | 108.94 | 2.0944 |
| N-methylformamide | 181.56 | 2.0503 |
